## Neuropilin-1 in tumor growth

### Shailendra Kapoor

**Commentary on:** Prud'homme GJ, Glinka Y. Neuropilins are multifunctional coreceptors involved in tumor initiation, growth, metastasis and immunity. *Oncotarget*. 2012; 3:921-39.

The recent article by Prud'homme et al [1] suggests that neuropilin-1 may contribute to tumor progression in a number of systemic malignancies and that its down regulation may markedly decrease tumor growth. For instance, up regulation of neuropilin-1 levels results in a poor clinical outcome in tongue squamous cell carcinomas. Shorter overall survival is seen in oral tumors with NRP1/SEMA3A ratio greater than one [2]. Overall, invasiveness in these tumors is attenuated by knockdown of neuropilin-1. Neuropilin-1 knock-down is accompanied by attenuation of intra-tumoral vimentin levels [3]. A simultaneous increase in intra-tumoral E-cadherin levels is seen. Neuropilin-1 knockdown may be a potential therapeutic modality for treatment of tongue malignancies. Similarly, increased expression of neuropilin-1 is seen in breast carcinoma stem like cells. This accentuation of neuropilin-1 levels results in altered NF- $\kappa$ B activation and subsequent formation of tumor mammospheres [4]. Mammosphere formation is significantly attenuated by knock-down of neuropilin-1 by siRNA. Neuropilin-1 knock-down also results in decreased ERK1/2 phosphorylation. Thus neuropilin-1 may be a potential target for abrogation of tumor growth in breast carcinomas. Similarly, increased neuropilin-1 levels are seen in colorectal carcinomas. Agents such as miR-320a abrogate the risk of developing hepatic metastasis in these tumors [5]. miR-320a mediates this effect by down-regulating neuropilin-1 expression and the near future may see its increased use to attenuate the risk of liver metastasis from colorectal malignancies. Increased neuropilin-1 expression is also seen in pancreatic malignancies. The administration of sema3A-lytic hybrid peptide abrogates growth and progression in pancreatic malignancies by binding to neuropilin-1 [6]. Neuropilin-1 also promotes tumor growth in hepatocellular carcinomas by modulating vascular remodeling [7].

The above examples clearly illustrate the role of neuropilin-1 in tumor progression in systemic malignancies and the urgent need to identify further inhibitors of neuropilin-1 expression.

**Shailendra Kapoor:** University of Illinois at Chicago, Chicago, IL

**Correspondence:** Shailendra Kapoor, **email** shailendraka-poor@yahoo.com

**Received:** November 04, 2012;

**Published:** November 05, 2012;

### REFERENCES

1. Prud'homme GJ, Glinka Y. Neuropilins are multifunctional coreceptors involved in tumor initiation, growth, metastasis and immunity. *Oncotarget*. 2012; 3:921-39.
2. Song X et al. *Med Oral Patol Oral Cir Bucal* 2012;.
3. Wang ZL et al. *Head Neck Oncol* 2012;4:54.
4. Glinka Y et al. *Biochem Biophys Res Commun* 2012;425:775-80.
5. Zhang Y et al. *Oncol Rep* 2012;27:685-94.
6. Ueyama H et al. *Biochem Biophys Res Commun* 2011;414:60-6.
7. Berge M et al. *J Hepatol* 2011;55:866-75.
